# Supplementary material
Source: Springer Nature journal article supplement (https://www.springermedizin.de/resource/supplementary/12986_2013_571_MOESM4_ESM.pdf/25655056)

A

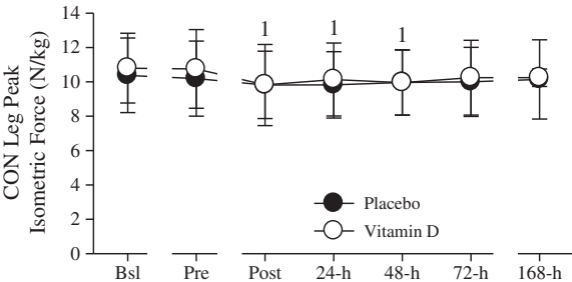

B

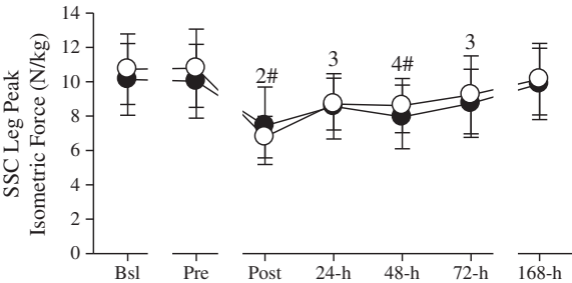

Supplement: MOESM4 [file 25655056]
